# Supplementary material for: Genotype-Phenotype Associations in a Nonmodel Prokaryote
Source: PubMed Central journal article supplement — mBio. 2012 Mar 20;3(2):e00001-12. doi: 10.1128/mBio.00001-12 (PMC3312209; doi:10.1128/mbio.00001-12), 2012-03-20
Supplement: mbo002121250sf02.pdf [file mbo002121250sf02.pdf]

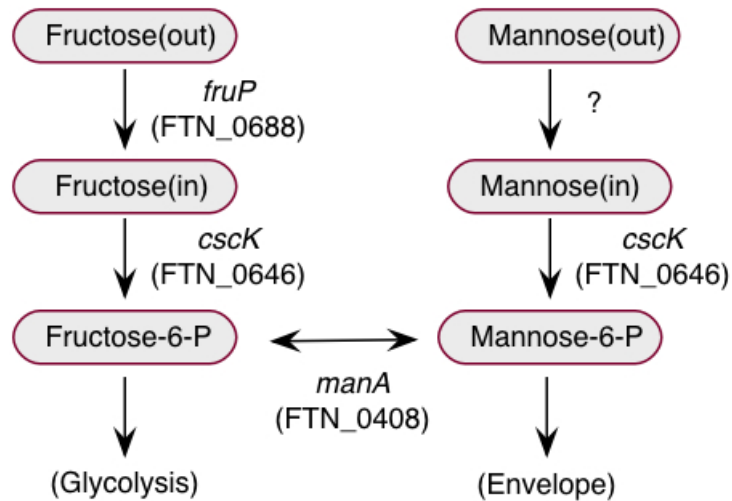

**Figure S2. Fructose and mannose utilization pathway mutants.**

Mutations in the gene predicted to encode mannose-6-phosphate isomerase (*manA*, FTN\_0408) reduced growth on mannose and fructose (Data set S2). Two additional genes required for growth on the sugars correspond to a predicted sugar kinase (*cscK*), which appears to act on both fructose and mannose, and a predicted transporter ("*fruP*", FTN\_0688), which appears to import fructose. Mutations in FTN\_0511 and FTN\_0512 (*glgX*) also led to fructose-minus phenotypes.
