# Supplementary material for: Genotype-Phenotype Associations in a Nonmodel Prokaryote
Source: PubMed Central journal article supplement — mBio. 2012 Mar 20;3(2):e00001-12. doi: 10.1128/mBio.00001-12 (PMC3312209; doi:10.1128/mbio.00001-12), 2012-03-20
Supplement: mbo002121250sf03.pdf [file mbo002121250sf03.pdf]

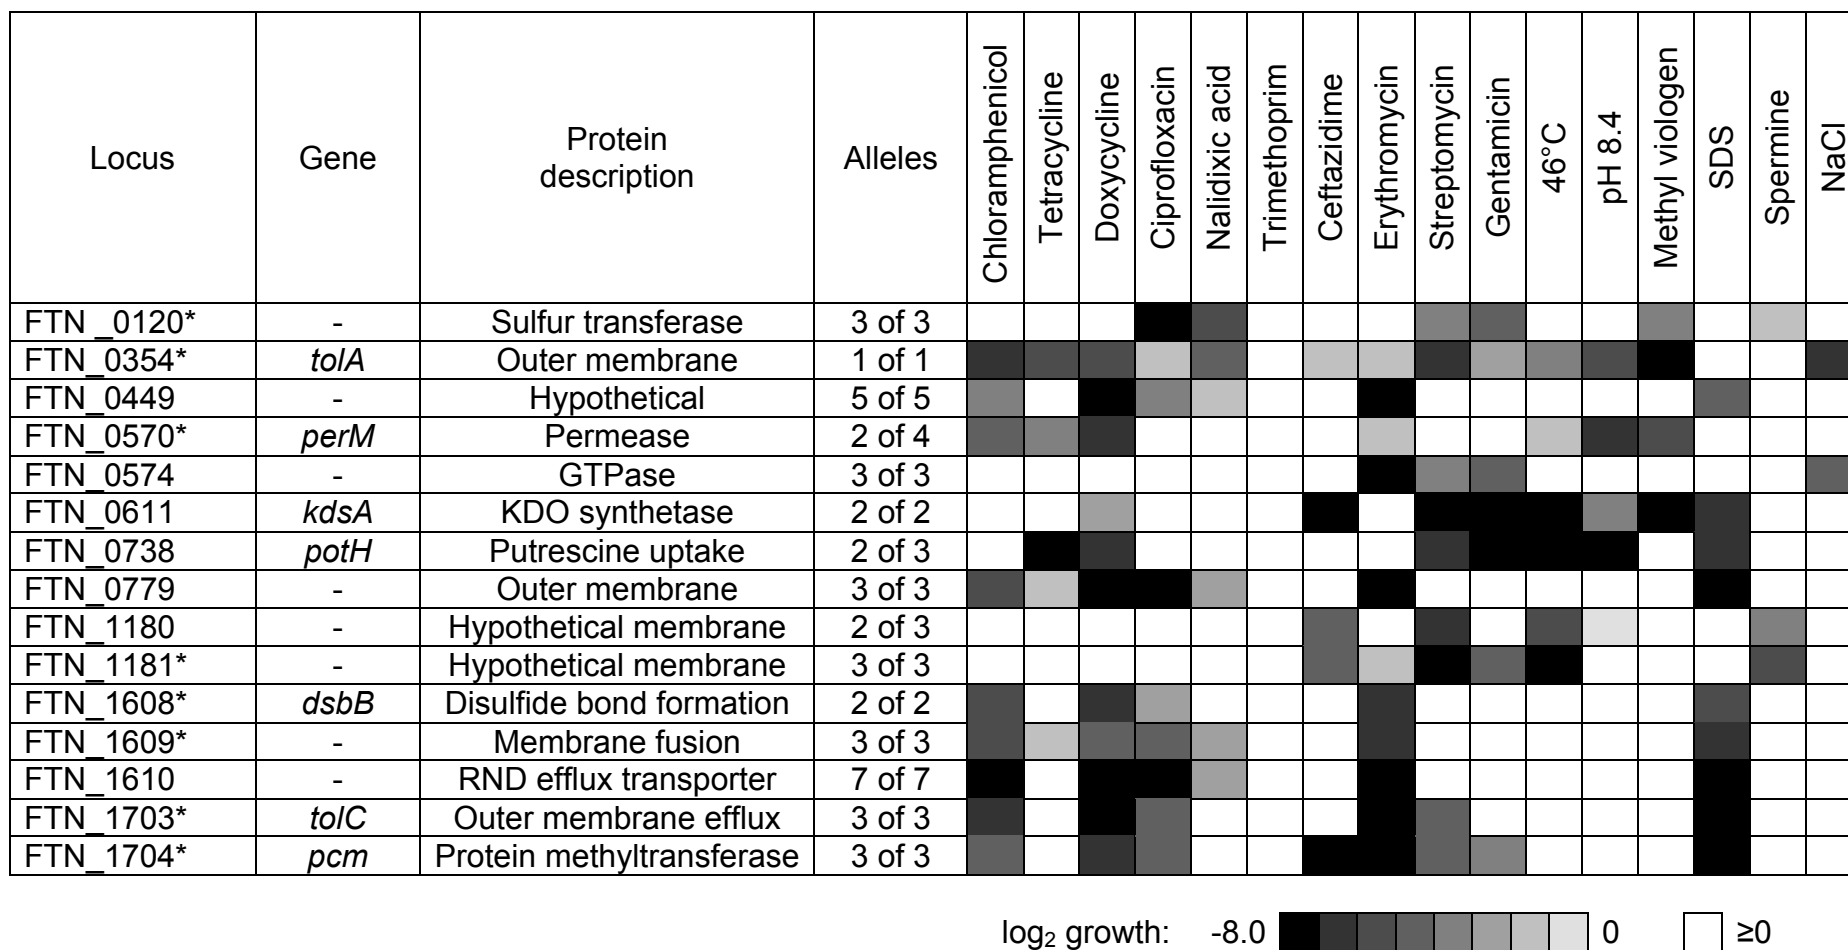

**Figure S3. Mutants sensitive to multiple antibiotics.** Shadings reflect the average growth of the two strongest alleles for each gene. Nutritional phenotypes are not shown. Asterisks indicate cases in which polar effects on expression of downstream genes could contribute to phenotypes. The number of mutant alleles for each gene leading to increased sensitivity is provided.
