# Supplementary material for: Genotype-Phenotype Associations in a Nonmodel Prokaryote
Source: PubMed Central journal article supplement — mBio. 2012 Mar 20;3(2):e00001-12. doi: 10.1128/mBio.00001-12 (PMC3312209; doi:10.1128/mbio.00001-12), 2012-03-20
Supplement: mbo002121250sf04.pdf [file mbo002121250sf04.pdf]

| Locus     | Gene        | Protein Description | alleles | Growth condition |                |              | Conserved association? |
|-----------|-------------|---------------------|---------|------------------|----------------|--------------|------------------------|
|           |             |                     |         | Ciprofloxacin    | Naladixic acid | Trimethoprim |                        |
| FTN_0122  | <i>recA</i> | Recombinase         | 3 of 3  | ■                | ■              |              | +                      |
| FTN_0189  | <i>priA</i> | Primase             | 3 of 3  | ■                | ■              | ■            |                        |
| FTN_0399  | <i>radA</i> | DNA repair          | 3 of 3  | ■                |                |              | +                      |
| FTN_0412  | <i>recN</i> | DNA repair          | 4 of 4  | ■                | ■              |              | +                      |
| FTN_0632  | <i>dgt</i>  | dGTP triphosphatase | 3 of 5  | ■                |                | ■            | +                      |
| FTN_0787  | <i>rep</i>  | Helicase            | 5 of 5  | ■                | ■              |              |                        |
| FTN_0891  | <i>ruvB</i> | Helicase            | 4 of 4  | ■                | ■              |              |                        |
| FTN_1025  | <i>ruvA</i> | Helicase            | 2 of 2  | ■                | ■              |              | +                      |
| FTN_1027* | <i>ruvC</i> | DNase               | 2 of 2  | ■                |                |              | +                      |
| FTN_1168* | <i>xseA</i> | Exonuclease         | 3 of 3  | ■                | ■              |              | +                      |
| FTN_1177* | <i>sbcB</i> | Exonuclease         | 4 of 4  | ■                | ■              |              |                        |
| FTN_1356  | <i>recD</i> | Exonuclease         | 3 of 3  | ■                | ■              | ■            |                        |
| FTN_1357  | <i>recB</i> | Exonuclease         | 5 of 5  | ■                | ■              | ■            | +                      |
| FTN_1359* | <i>recC</i> | Exonuclease         | 3 of 3  | ■                | ■              | ■            | +                      |
| FTN_1513  | <i>xerC</i> | Recombinase         | 3 of 3  | ■                | ■              |              | +                      |
| FTN_1558  | <i>xerD</i> | Recombinase         | 3 of 3  | ■                | ■              |              | +                      |

log<sub>2</sub> growth: -8.0  0  ≥0

**Figure S4. Quinolone antibiotic hypersensitive mutants.** Mutations leading to increased ciprofloxacin and/or naladixic acid sensitivity are shown. Shadings reflect average growth of the two alleles with the strongest defects for each gene. Nutritional phenotypes are not shown. Asterisks indicate cases in which polar effects on expression of downstream genes could contribute to phenotypes. Several genes with strong mutant phenotypes that could be explained by polarity were not included in the table (FTN\_0120, FTN\_0121, FTN\_0188, FTN\_400, and FTN\_401). The number of mutant alleles for each gene leading to increased sensitivity is provided. Functions associated with quinolone intrinsic resistance in *E. coli* are indicated.
